# Supplementary material for: Critical roles for ‘housekeeping’ nucleases in type III CRISPR-Cas immunity
Source: eLife. 2022 Dec 8;11:e81897. doi: 10.7554/eLife.81897 (PMC9762709; doi:10.7554/eLife.81897)
Supplement: Figure 1—source data 3. [file elife-81897-fig1-data3.xlsx]

## Sheet: Sheet1
Figure 1-source data 3. Accompanies Figure 1F. Percent values of intermediate crRNAs extracted from indicated S. epidermidis LM1680 strains harboring pcrispr-cas/csm2(H6N)*
	WT	Δrnr	Δrnr::rnr*	ΔrnrΔpnp	ΔrnrΔpnp::rnr*
Replicate 1	0.036	0.257	0.081	0.953	0.471
Replicate 2	0.035	0.334	0.054	0.953	0.389
Replicate 3	0.034	0.286	0.032	0.944	0.432
Average	0.035	0.292333	0.0556667	0.95	0.430667
S.D.	0.001	0.0388887	0.0245425	0.00519615	0.0410163
p-values (2 tailed t-test)		0.000331172	0.218764	7.45604e-10	7.52704e-05
*Complexes were purified once from three independent transformants, and each replicate represents an independent trial of crRNA extraction and quantification from these purified complexes.
