# Supplementary material for: Critical roles for ‘housekeeping’ nucleases in type III CRISPR-Cas immunity
Source: eLife. 2022 Dec 8;11:e81897. doi: 10.7554/eLife.81897 (PMC9762709; doi:10.7554/eLife.81897)
Supplement: Figure 2—source data 4. [file elife-81897-fig2-data4.xlsx]

## Sheet: Sheet1
Figure 2-source data 4. Accompanies Figure 2E. Percent of intermediate crRNAs bound to Cas10-Csm (71) complexes following incubation with various exonucleases*
	WT / Cas10-Csm	ΔrnrΔpnp / Cas10-Csm (71)
Exonucleases	-	-	Cbf1	RNase R	PNPase	RNase R & PNPase
Replicate 1	0.03	0.92	0.93	0.72	0.15	0.02
Replicate 2	0.03	0.94	0.97	0.72	0.16	0.04
Replicate 3		0.97	0.97	0.72	0.2	0.05
Replicate 4		0.94	0.95
Average	0.03	0.9425	0.955	0.72	0.17	0.0366667
S.D.	0	0.0206155	0.0191485	1.35974e-16	0.0264575	0.0152753
*Complexes were purified once from two independent transformants, and each replicate represents an independent trial of the nuclease assay.
