# Supplementary material for: Critical roles for ‘housekeeping’ nucleases in type III CRISPR-Cas immunity
Source: eLife. 2022 Dec 8;11:e81897. doi: 10.7554/eLife.81897 (PMC9762709; doi:10.7554/eLife.81897)
Supplement: Figure 4—source data 3. [file elife-81897-fig4-data3.xlsx]

## Sheet: Sheet1
Figure 4-source data 3. Accompanies Figure 4D. Percent of intermediate crRNAs bound to Cas10-Csm complexes extracted from S. epidermidis LM1680 strains harboring indicated variants of Csm5 in pcrispr-cas/csm5(H6N)*
	Csm5 WT	Csm5 Δ18	Csm5 Δ31	Csm5 Δ46
Replicate 1	0.16	0.58	0.7	0.53
Replicate 2	0.15	0.5	0.4	0.64
Replicate 3	0.19	0.66	0.52	0.86
Replicate 4	0.17	0.65	0.52	0.88
Average	0.1675	0.5975	0.535	0.7275
S.D.	0.0170783	0.0741058	0.123693	0.170758
P Values (2 tailed t-test)		2.8612e-05	0.00106615	0.000617678
*Complexes were purified at least twice for each variant, and each replicate represents an independent trial of crRNA extraction and quantification from purified complexes.
