# Supplementary material for: Critical roles for ‘housekeeping’ nucleases in type III CRISPR-Cas immunity
Source: eLife. 2022 Dec 8;11:e81897. doi: 10.7554/eLife.81897 (PMC9762709; doi:10.7554/eLife.81897)
Supplement: Figure 6—figure supplement 1—source data 1. [file elife-81897-fig6-figsupp1-data1.xlsx]

## Sheet: Sheet1
Figure 6-figure supplement 1-source data 1. Accompanies Figure 6-figure supplement 1B. CNPx plaque counts in pfu/mL when plated on various S. epidermidis LM1680 strains harboring indicated plasmids*
	WT / pEmptyVector	WT / pcrispr-cas	Δrnr / pcrispr-cas	Δrnr Δpnp / pcrispr-cas	WT / pcrispr-cas Δcsm5	Δrnr Δpnp / pcrispr-cas Δcsm5
Replicate 1	10000000	0	0	0	0	0
Replicate 2	10000000	0	0	0	0	0
Replicate 3	20000000	0	0	0	0	0
Average	1.33333e+07	0	0	0	0	0
S.D.	5.7735e+06	0	0	0	0	0
*Values were obtained from three independent trials using three independent transformants.
