# Supplementary material for: Critical roles for ‘housekeeping’ nucleases in type III CRISPR-Cas immunity
Source: eLife. 2022 Dec 8;11:e81897. doi: 10.7554/eLife.81897 (PMC9762709; doi:10.7554/eLife.81897)
Supplement: Figure 6—source data 1. [file elife-81897-fig6-data1.xlsx]

## Sheet: Sheet1
Figure 6-source data 1. Accompanies Figure 6C. Recipients, transconjugants, and conjugation efficiencies measured for indicated S. epidermidis RP62a strains*
	WT			Δspc1-3			Δrnr			Δrnr::rnr*			Δrnr Δpnp			Δrnr Δpnp::rnr*			Δpnp
	Recipients	Transconjugants	Conj. Efficiency	Recipients	Transconjugants	Conj. Efficiency	Recipients	Transconjugants	Conj. Efficiency	Recipients	Transconjugants	Conj. Efficiency	Recipients	Transconjugants	Conj. Efficiency	Recipients	Transconjugants	Conj. Efficiency	Recipients	Transconjugants	Conj. Efficiency
Replicate 1	1400000000	0	0	1100000000	60000	5.45455e-05	600000000	100	1.66667e-07	600000000	0	0	1200000000	5000	4.16667e-06	500000000	0	0	800000000	0	0
Replicate 2	900000000	0	0	1800000000	260000	0.000144444	200000000	300	1.5e-06	600000000	100	1.66667e-07	900000000	70000	7.77778e-05	900000000	0	0	500000000	600	1.2e-06
Replicate 3	900000000	0	0	1800000000	260000	0.000144444	90000000	100	1.11111e-06	400000000	0	0	1500000000	30000	2e-05	1000000000	0	0	300000000	300	1e-06
Replicate 4	1400000000	100	7.14286e-08	1300000000	190000	0.000146154	210000000	100	4.7619e-07	400000000	0	0	900000000	90000	0.0001	300000000	200	6.66667e-07	600000000	0	0
Replicate 5	1400000000	100	7.14286e-08	1300000000	190000	0.000146154	200000000	200	1e-06	400000000	0	0	600000000	110000	0.000183333	500000000	200	4e-07	400000000	0	0
Average	1200000000	40	2.85714e-08	1460000000	192000	0.000127148	260000000	160	8.50794e-07	480000000	20	3.33333e-08	1020000000	61000	7.70556e-05	640000000	80	2.13333e-07	520000000	180	4.4e-07
S.D.	2.73861e+08	54.7723	3.9123e-08	3.20936e+08	81670.1	4.05953e-05	1.96342e+08	89.4427	5.29116e-07	1.09545e+08	44.7214	7.45356e-08	3.42053e+08	43069.7	7.13969e-05	2.96648e+08	109.545	3.06956e-07	1.92354e+08	268.328	6.0663e-07
P-Values (2 tailed t-test)						0.000112413			0.0085014			0.902465			0.0423496			0.218578			0.168635
*Values were obtained from five independent trials using three biological replicates.
