# Supplementary material for: Critical roles for ‘housekeeping’ nucleases in type III CRISPR-Cas immunity
Source: eLife. 2022 Dec 8;11:e81897. doi: 10.7554/eLife.81897 (PMC9762709; doi:10.7554/eLife.81897)
Supplement: Figure 6—source data 2. [file elife-81897-fig6-data2.xlsx]

## Sheet: Sheet1
Figure 6-source data 2. Accompanies Figure 6E. Recipients, transconjugants, and conjugation efficiencies measured for various S. epidermidis RP62a strains harbouring indicated plasmids*
	WT / pcrispr-spc-opt			Δrnr Δpnp / pcrispr-spc-opt			WT / pcrispr-spc-sub			Δrnr Δpnp / pcrispr-spc-sub
	Recipients	Transconjugants	Conj. Efficiency	Recipients	Transconjugants	Conj. Efficiency	Recipients	Transconjugants	Conj. Efficiency	Recipients	Transconjugants	Conj. Efficiency
Replicate 1	100000000	0	0	300000000	0	0	120000000	400	3.33333e-06	300000000	40000	0.000133333
Replicate 2	300000000	0	0	300000000	200	6.66667e-07	300000000	300	1e-06	300000000	60000	0.0002
Replicate 3	400000000	200	5e-07	100000000	0	0	200000000	1000	5e-06	600000000	40000	6.66667e-05
Average	2.66667e+08	66.6667	1.66667e-07	2.33333e+08	66.6667	2.22222e-07	2.06667e+08	566.667	3.11111e-06	400000000	46666.7	0.000133333
S.D.	1.52753e+08	115.47	2.88675e-07	1.1547e+08	115.47	3.849e-07	9.0185e+07	378.594	2.00924e-06	1.73205e+08	11547	6.66667e-05
P-Values (2 tailed t-test)						0.851237						0.0277409
*Values were obtained from three independent trials using two independent transformants.
