# Supplementary material for: Critical roles for ‘housekeeping’ nucleases in type III CRISPR-Cas immunity
Source: eLife journal article supplement (doi:10.7554/elife.81897), 2022-12-08
Supplement: figures [file elife-81897-figures-v2.pdf]

---

## Figures and figure supplements

Critical roles for ‘housekeeping’ nucleases in type III CRISPR-Cas immunity

**Lucy Chou-Zheng and Asma Hatoum-Aslan.**

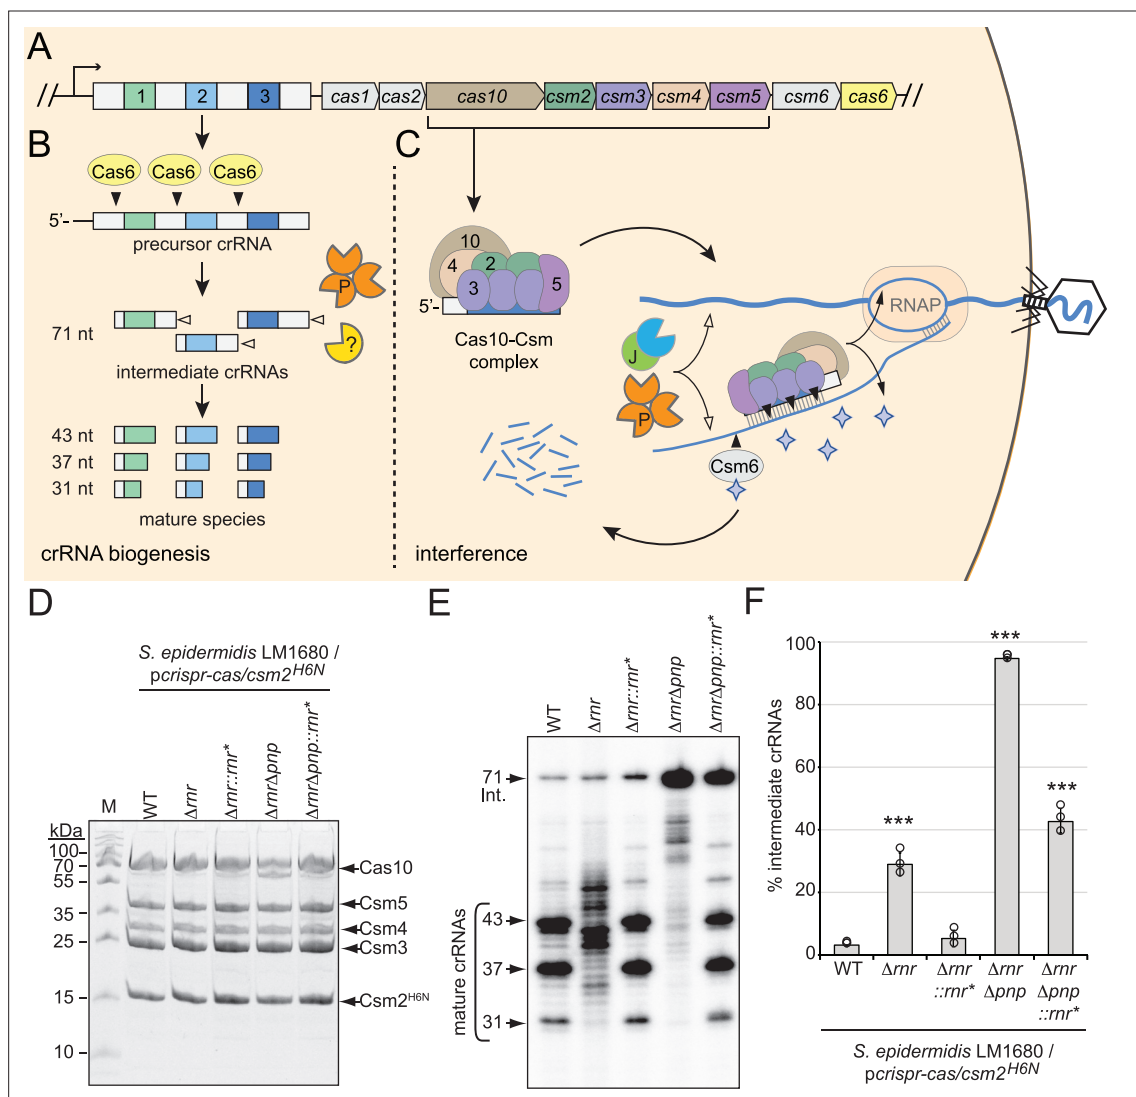

**Figure 1.** RNase R and PNPase are necessary for crRNA maturation in the cell. **(A)** The type III-A CRISPR-Cas system (herein referred to as CRISPR-Cas10) in *S. epidermidis* RP62a encodes three spacers (colored squares), four repeats (light gray squares), and nine CRISPR-associated (*cas* and *csm*) genes (colored pentagons). **(B)** During crRNA biogenesis, the repeat-spacer array is transcribed into a precursor crRNA and processed into mature species in two steps. In the first step, the endoribonuclease Cas6 cleaves within repeat sequences to generate intermediate crRNAs of 71 nt in length. In the second step, intermediates are trimmed on their 3'-ends by PNPase and other unknown nuclease(s), which are the subject of this study. These activities generate mature crRNAs that range from 43 to 31 nt in length. **(C)** Mature crRNAs associate with Cas10, Csm2, Csm3, Csm4, and Csm5 in various stoichiometries to form the Cas10-Csm effector complex. Interference is initiated when the effector complex binds to invading transcripts that bear complementarity to the crRNA. During interference, invading DNA and RNA are degraded by CRISPR-associated (Cas) and non-Cas nucleases (see text for details). Filled triangles illustrate events catalyzed by Cas enzymes, and open triangles illustrate events catalyzed by non-Cas nucleases. P, PNPase; J, RNase J1/J2; RNAP, RNA polymerase. Purple stars represent cyclic oligoadenylate molecules produced by Cas10. **(D)** Cas10-Csm complexes extracted from indicated *S. epidermidis* LM1680 strains bearing *pcrispr-cas/csm2<sup>H6N</sup>* are shown. The plasmid *pcrispr-cas* contains the entire CRISPR-Cas10 system with a 6-His tag on the N-terminus of Csm2. Whole-cell lysates from indicated strains were subjected to Ni<sup>2+</sup> affinity chromatography, and purified complexes were resolved in an SDS-PAGE gel and visualized with Coomassie G-250 staining. M, denaturing protein marker; kDa, kilodalton. See **Figure 1—source data 1.** **(E)** Total crRNAs associated with Cas10-Csm complexes in panel (D) are shown. Complex-bound crRNAs were extracted from complexes, radiolabeled at their 5'-ends, and resolved on a denaturing gel. See **Figure 1—source data 2.** **(F)** Fractions of complex-bound intermediate crRNAs relative to total crRNAs are shown for indicated strains. The percent intermediate crRNAs represents the ratio of the intermediate (71 nt) band density to the sum of band densities of the major crRNA species (71, 43, 37, and 31 nt). Data shown represents an average of three independent trials ( $\pm$  S.D). A two-tailed t-test was performed to determine significance and \*\*\* indicates  $p < 0.0005$ . See **Figure 1—source data 3.**

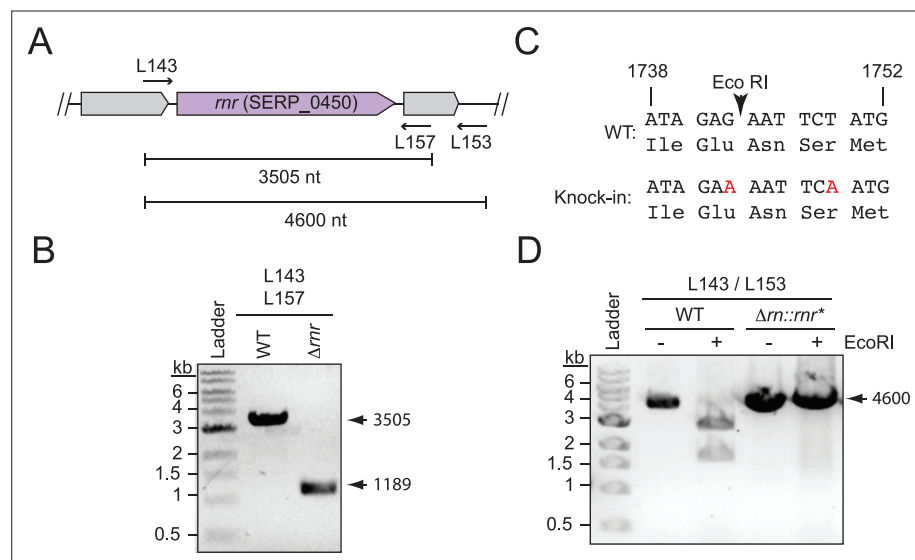

**Figure 1—figure supplement 1.** Confirmation of *rnr* knock-out and knock-in *S. epidermidis* strains. **(A)** Illustration of the *rnr* genomic locus and corresponding primers used to amplify the gene (see **Supplementary file 2** for primer sequences). **(B)** PCR products of *rnr* region from representative *S. epidermidis* WT and knock-out strains are shown. The *rnr* gene was deleted using the pKOR1 allelic replacement system (**Bae and Schneewind, 2006**). Following mutagenesis, the *rnr* deletion was confirmed by PCR amplification of the genomic locus with primers L143/L157 and sequencing the PCR product. See **Figure 1—figure supplement 1—source data 1**. **(C)** A segment of the coding region of *rnr* into which two silent mutations were introduced (red nucleotides) to distinguish the knock-in strain from wild-type. The two silent mutations in *rnr* gene (*rnr*<sup>\*</sup>) remove a native EcoRI restriction site naturally found within *rnr* gene. The *rnr*<sup>\*</sup> variant was replaced into its original genetic locus in knockout strains using the pKOR1 allelic replacement system (**Bae and Schneewind, 2006**). **(D)** PCR products of *rnr* region from representative *S. epidermidis* wild-type and knock-in strains are shown. Following mutagenesis, *rnr*<sup>\*</sup> was confirmed by PCR amplifying genomic DNA with primers L143/L153, and digesting PCR products with EcoRI restriction enzyme, and sequencing the PCR product. kb, kilobase. See **Figure 1—figure supplement 1—source data 2**.

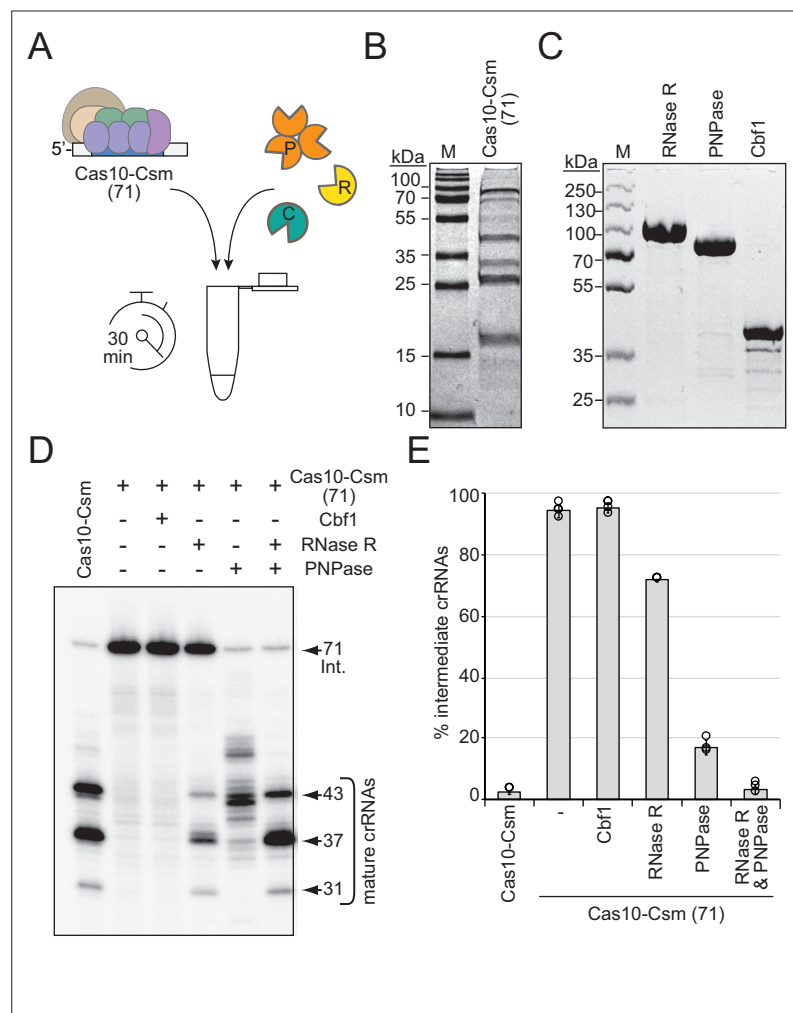

**Figure 2.** RNase R and PNPase are sufficient to complete crRNA maturation in a purified system. **(A)** Illustration of experimental flow of the crRNA maturation nuclease assay. P, PNPase; R, RNase R; C, Cbf1; Cas10-Csm (71), Cas10-Csm complexes purified from *S. epidermidis* LM1680ΔpnpΔrnr. **(B)** Purified Cas10-Csm (71) complexes used in this assay. See **Figure 2—source data 1**. M, denaturing protein marker. kDa, kilodalton. **(C)** Purified recombinant exonucleases RNase R, PNPase, and Cbf1 used in this assay. See **Figure 2—source data 2**. **(D)** Cas10-Csm (71) complexes were incubated with indicated nucleases for 30 min at 37°C. After digestion, crRNAs were extracted from the complexes, radiolabeled at their 5'-ends, and resolved on a denaturing gel. The leftmost lane shows crRNAs extracted from Cas10-Csm complexes purified from WT cells as a control. See also **Figure 2—figure supplement 1** and **Figure 2—source data 3**. **(E)** Quantification of complex-bound intermediate crRNAs (relative to total crRNAs) following crRNA maturation assays. The data represent an average of 2–4 independent trials (± S.D.). See **Figure 2—source data 4**.

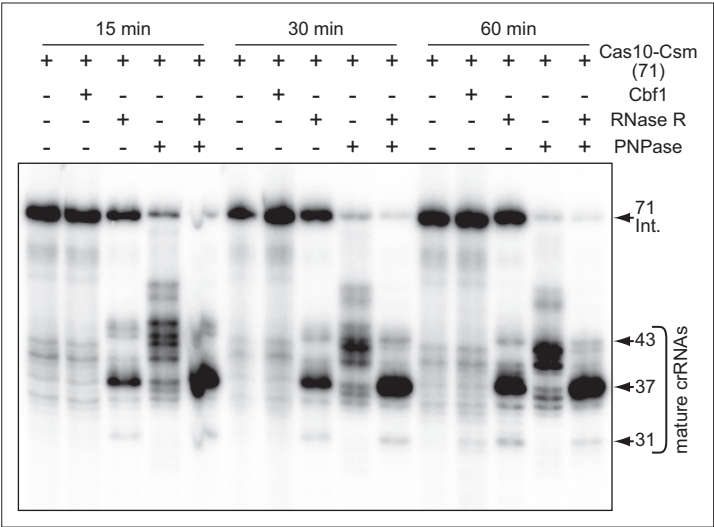

**Figure 2—figure supplement 1.** RNase R alone cannot complete crRNA maturation in a purified system. Total crRNAs associated with purified Cas10-Csm (71) complexes are shown after digestion with indicated nucleases for different timepoints (15, 30, and 60 min). CrRNAs were extracted using TRIzol Reagent, radiolabeled at their 5'-ends, and resolved on a denaturing gel. The gel shown is a representative of two independent trials. See **Figure 2—figure supplement 1—source data 1**.

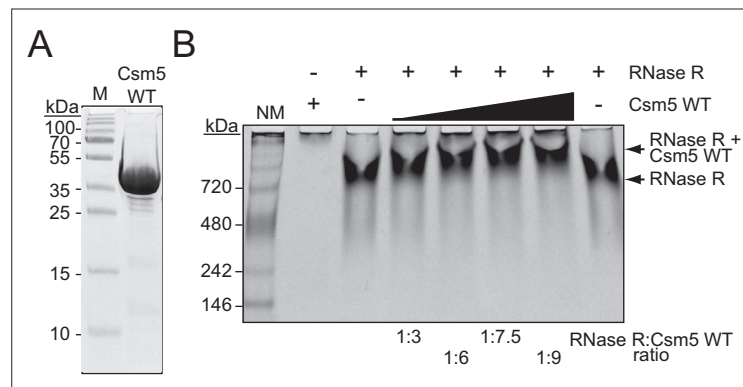

**Figure 3.** Csm5 interacts with RNase R. **(A)** Purified recombinant WT Csm5 is shown. The protein was resolved in an SDS-PAGE gel and visualized using Coomassie G-250 staining. M, denaturing protein marker; kDa, kilodalton. See **Figure 3—source data 1**. **(B)** Native gel showing RNase R resolved with increasing proportions of Csm5 WT. Shown is a representative of three independent trials. NM, native protein marker. See also **Figure 3—figure supplement 1**, **Figure 3—figure supplement 2**, and **Figure 3—source data 2**.

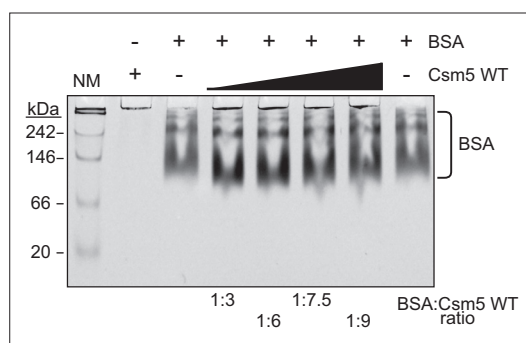

**Figure 3—figure supplement 1.** Csm5 does not interact with bovine serum albumin (BSA). Shown is a native gel in which BSA was resolved alone or with increasing concentrations of Csm5 WT. The gel shown is a representative of three independent trials. NM, native protein marker; kDa, kilodalton. See **Figure 3—figure supplement 1—source data 1**.

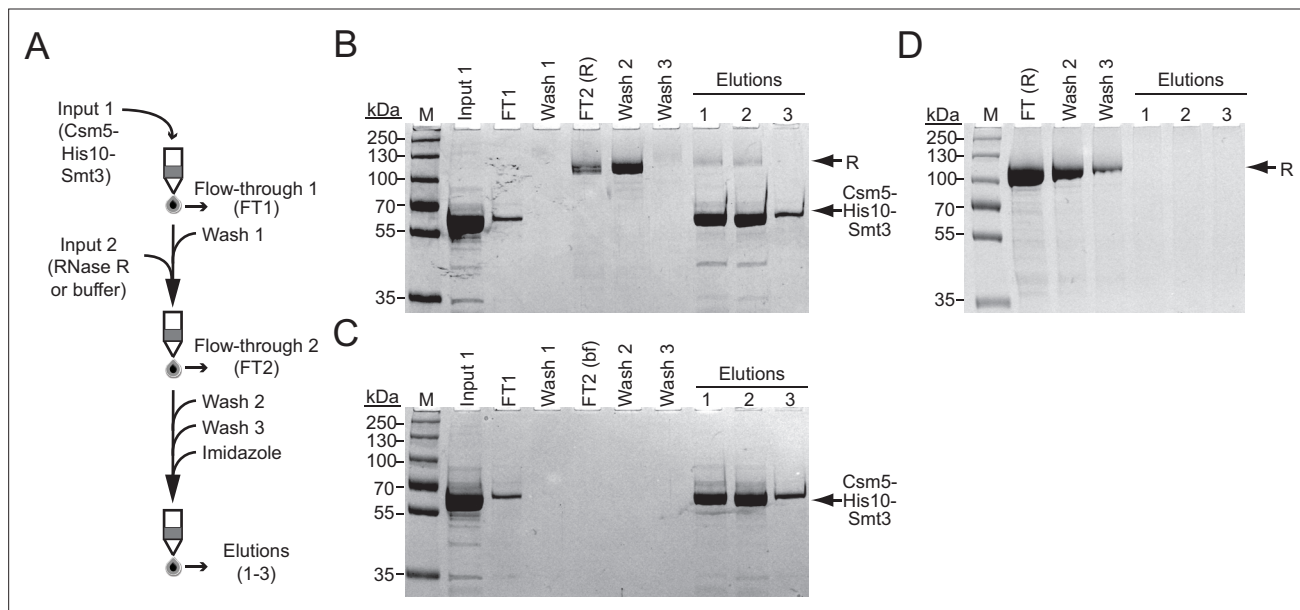

**Figure 3—figure supplement 2.** Csm5 interacts weakly with RNase R in a pulldown assay. **(A)** Illustration of a pulldown assay in which Csm5-His10-Smt3 (input 1) is loaded onto a Ni<sup>2+</sup>-agarose column, the column is washed to remove unbound protein, and then untagged RNase R or protein buffer (input 2) is allowed to flow through the column. Following extensive washing of unbound proteins, those remaining in the column are eluted three times using imidazole. **(B, C)** The results of pulldown assays when RNase R **(B)** or protein buffer **(C)** is used as input 2. Proteins from indicated fractions were resolved on denaturing SDS-PAGE and visualized using Coomassie G-250 stain. R, RNase R; bf, protein buffer; M, denaturing protein marker; kDa, kilodalton. The gels shown are representatives of three independent trials. See **Figure 3—figure supplement 2—source data 1 and 2**. **(D)** A control experiment in which untagged RNase R is applied to the column in the absence of Csm5 and subjected to the same washes and elution steps as in panels **(B)** and **(C)**. The gel shown is a representative of three independent trials. See **Figure 3—figure supplement 2—source data 3**.



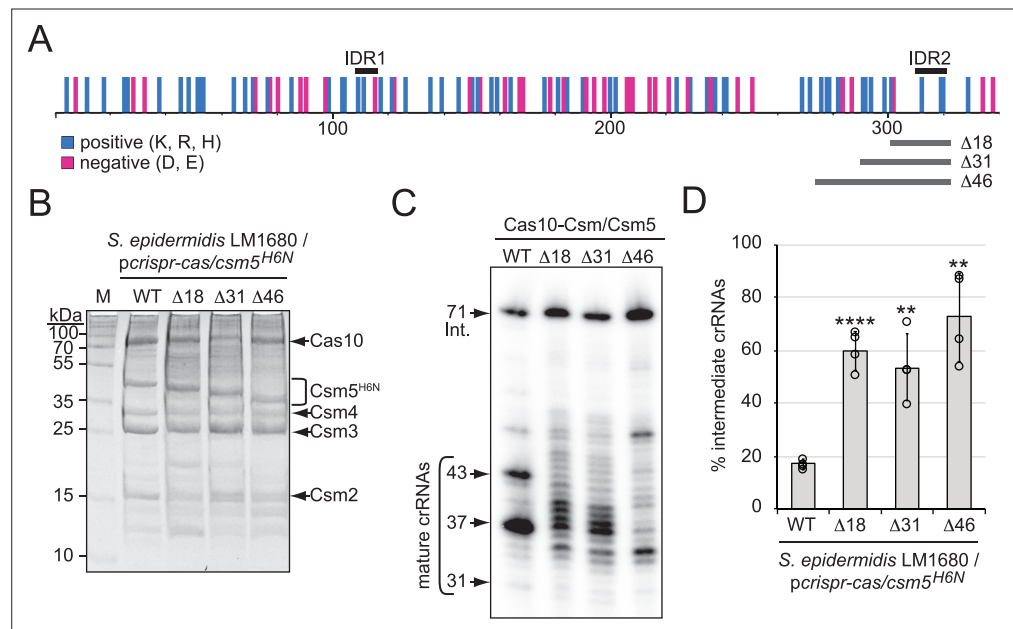

**Figure 4.** A predicted disordered region in Csm5 promotes crRNA maturation. **(A)** Illustration showing the distribution of charged residues, predicted disordered regions, and truncations introduced in Csm5. Positions of charged residues (positive, cyan; negative, magenta) are shown as vertical bars. Predicted intrinsically disordered regions (IDR1 and IDR2) and regions that were truncated are delimited by black and gray horizontal bars above and below, respectively. K, lysine; R, arginine; H, histidine; D, aspartate; E, glutamate. See also **Figure 4—figure supplement 1**. **(B)** Cas10-Csm complexes with various Csm5 truncations are shown. Complexes were extracted from *S. epidermidis* LM1680 cells harboring *pcrispr-cas/csm5<sup>H6N</sup>*, which has a 6-His tag on the N-terminus of Csm5 to confirm full complex assembly. Complexes were purified using  $\text{Ni}^{2+}$  affinity chromatography, resolved on and SDS-PAGE gel, and visualized with Coomassie G-250 staining. M, denaturing protein marker; kDa, kilodalton. See also **Figure 4—source data 1**. **(C)** Total crRNAs bound to indicated Cas10-Csm complexes were extracted, radiolabeled at their 5'-ends, and resolved on a denaturing gel. See also **Figure 4—source data 2**. **(D)** Fractions of complex-bound intermediate crRNAs relative to total crRNAs are shown for Csm5 truncation mutants. The percent of intermediate crRNAs represents the ratio of the intermediate (71 nt) band density to the sum of band densities of the major crRNA species (71, 43, 37, and 31 nt). The data represents an average of four independent trials ( $\pm$  S.D.). A two-tailed t-test was performed to determine significance and p-values obtained were  $<0.005$  (\*\*) or  $<0.00005$  (\*\*\*\*). See also **Figure 4—source data 3**.

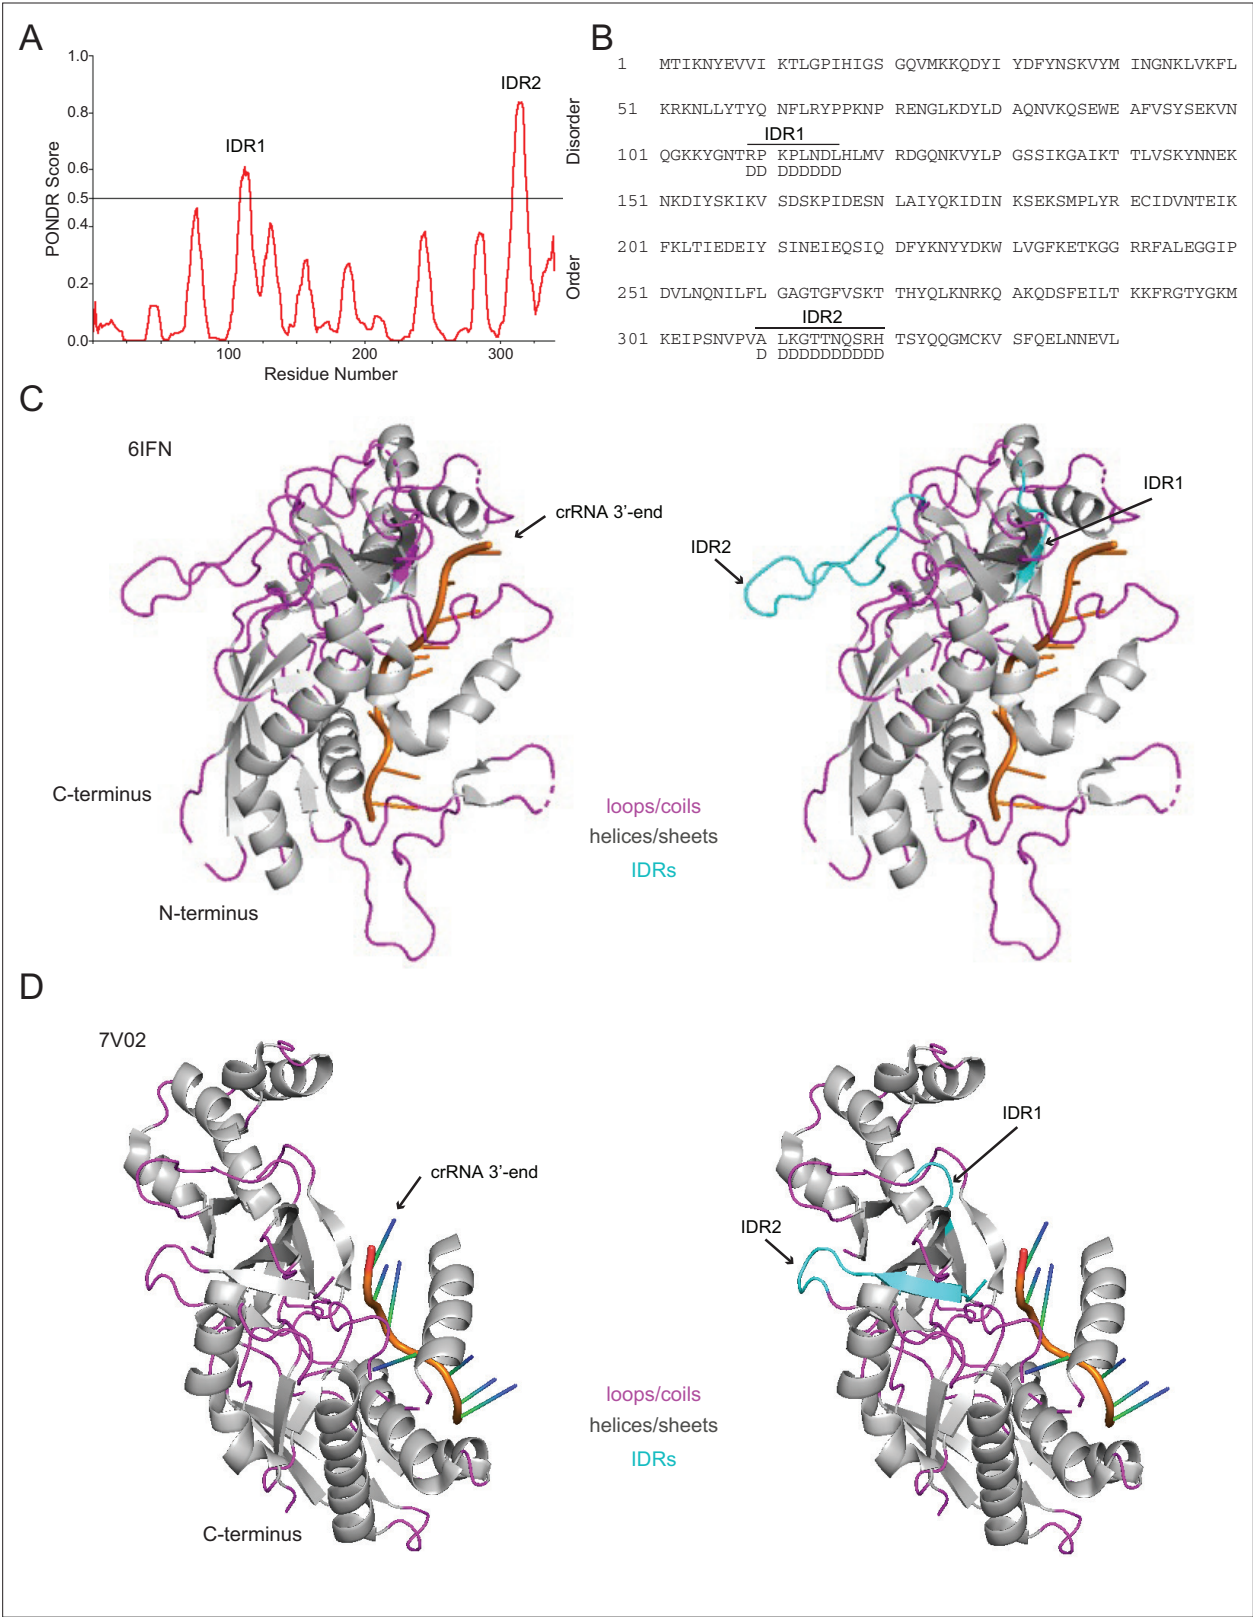

**Figure 4—figure supplement 1.** Predicted disordered regions of Csm5. **(A)** Predicted disordered regions in *S. epidermidis* Csm5 are shown. The PONDR (Predictor of Natural Disordered Regions) score was derived from the web-based tool with the same name ([pondr.com](https://pondr.com)). Regions with a score of 0.5 or higher have a high probability of being disordered. The two putative disordered regions of Csm5 are labeled as IDR1 and IDR2. **(B)** The amino acid sequence of Csm5 is shown with putative disordered regions delimited. IDR1 encompasses residues 109–116, and IDR2 encompasses residues 301–317. **(C)** and **(D)** show the 3D ribbon diagrams of Csm5 protein structure (6IFN and 7V02) with the crRNA 3'-end (orange) and the C-terminus (grey). The loops/coils (pink), helices/sheets (grey), and IDRs (cyan) are shown. IDR1 and IDR2 are labeled.

Figure 4—figure supplement 1 continued on next page

## Figure 4—figure supplement 1 continued

310–320. (C, D) The Csm5 subunit of the unbound Cas10-Csm complex from *Streptococcus thermophilus* (C) as determined by **You et al., 2019** (PDB ID 6IFN) and the Csm5 subunit of the unbound 'short' Cas10-Csm complex from *S. epidermidis* (D) as determined by **Smith et al., 2022** (PDB ID 7V02). Csm5 is colored according to secondary structure with loops/coils in magenta and helices/sheets in gray. The bound crRNA is shown in orange. Homologous residues encompassing predicted IDRs in *S. epidermidis* Csm5 are shown in cyan on the right. The figure was generated using PyMOL.

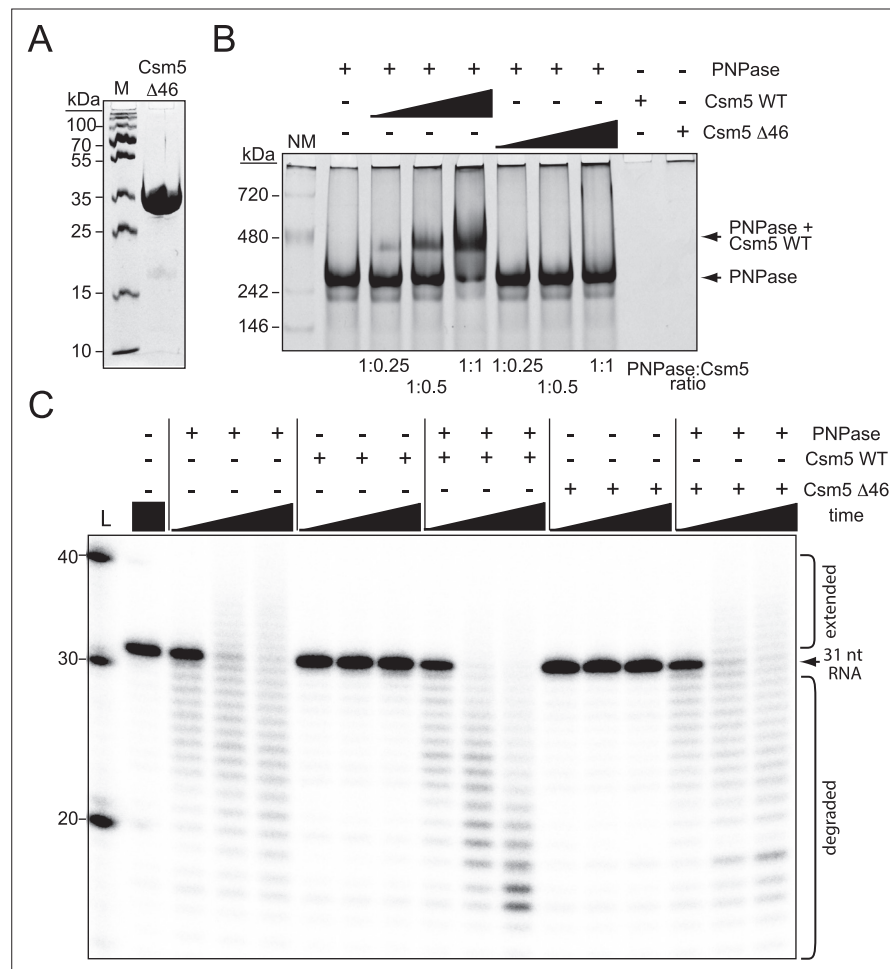

**Figure 5.** Csm5 interacts with and stimulates PNPase via a predicted disordered region. **(A)** Purified recombinant Csm5Δ46 is shown, in which IDR2 has been deleted. The protein was resolved on an SDS-PAGE gel and visualized using Coomassie G-250 staining. M, denaturing protein marker; kDa, kilodalton. See also **Figure 5—source data 1**. **(B)** PNPase was resolved on a native gel with increasing amounts of Csm5 (WT and Δ46). Shown is a representative of three independent trials. NM, native protein marker. See also **Figure 5—source data 2**. **(C)** Nuclease assays conducted with PNPase and/or Csm5 (WT and Δ46) are shown. In these assays, a 5'-end labeled 31-nucleotide RNA substrate was combined with indicated proteins, incubated at 37°C for increasing amounts of time (0.5, 5, and 15 mins), and resolved on a denaturing gel. Shown is a representative of two independent trials. L, RNA Ladder. See also **Figure 5—source data 3**.

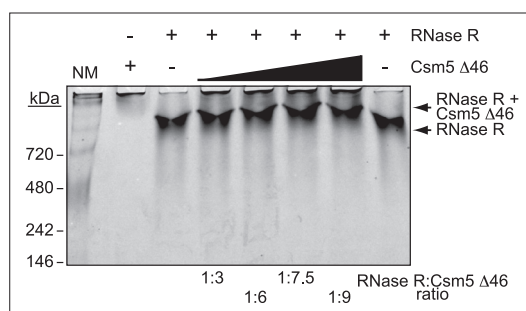

**Figure 5—figure supplement 1.** Csm5Δ46 retains interaction with RNase R. Shown is a native gel in which RNase R was resolved alone or with increasing concentrations of Csm5Δ46. The gel shown is a representative of three independent trials. NM, native protein marker; kDa, kilodalton. See **Figure 5—figure supplement 1—source data 1**.

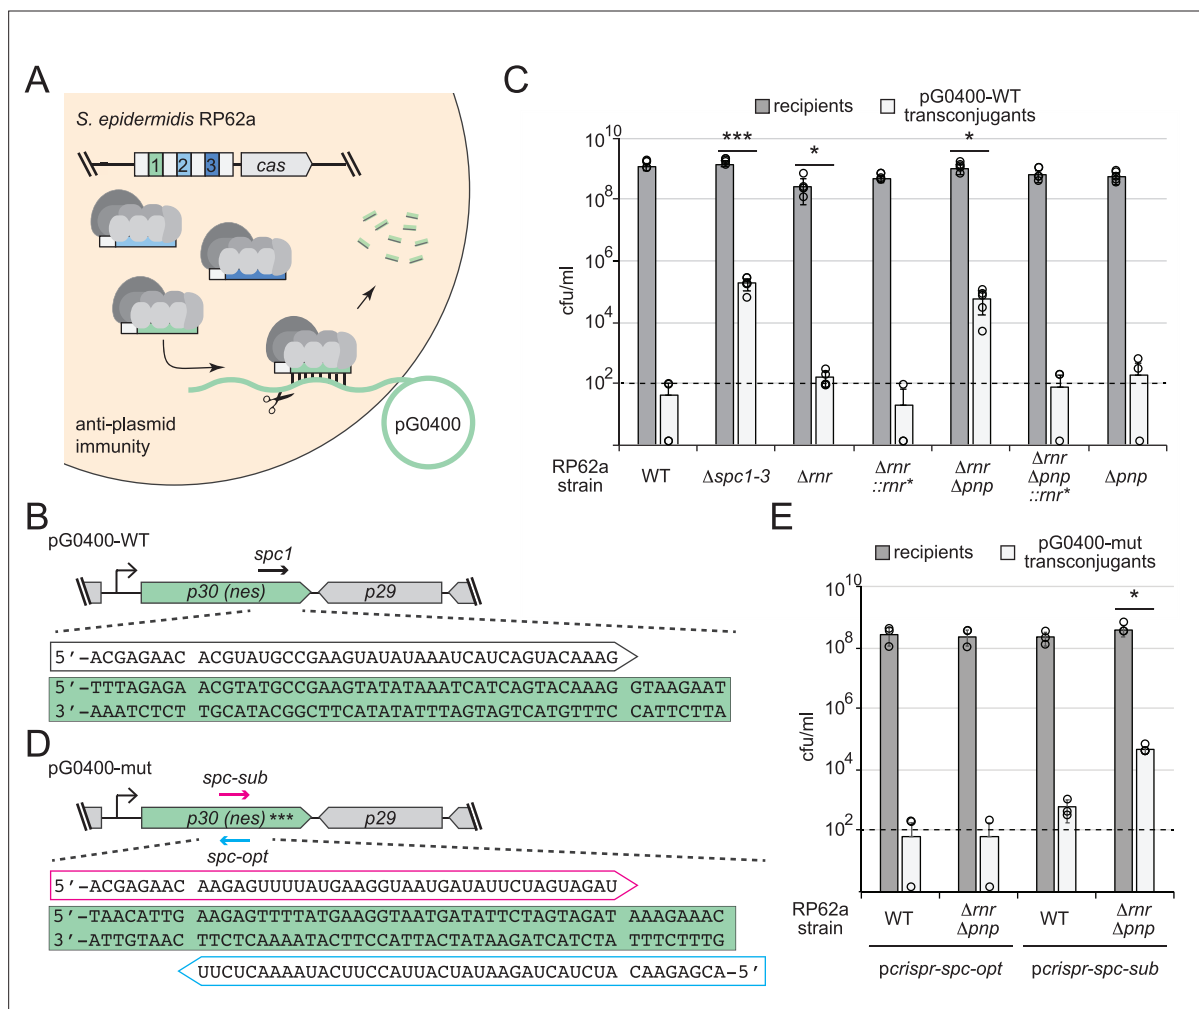

**Figure 6.** RNase R and PNPase work synergistically to promote robust anti-plasmid immunity. **(A)** Illustration of the anti-plasmid assay is shown in which the conjugative plasmid pG0400 is transferred from a *S. aureus* RN4220 donor (not shown) into various *S. epidermidis* RP62a recipient strains. The first spacer in the CRISPR locus (green square) bears complementarity to the nickase (*nes*) gene in pG0400. **(B, D)** Sequences of protospacers and corresponding crRNAs targeting pG0400-WT **(B)** and pG0400-mut **(D)**. Protospacer sequences are highlighted in green, and targeting crRNA sequences are shown in unfilled arrows. In pG0400-mut, asterisks represent nine silent mutations in the *spc1* protospacer region. **(C)** Results from conjugation assays in which indicated *S. epidermidis* RP62a recipient strains were mated with *S. aureus* RN4220/pG0400-WT donor cells. See **Figure 6—source data 1**. **(E)** Results from conjugation assays in which various *S. epidermidis* RP62a recipient strains harboring indicated plasmids were mated with *S. aureus* RN4220/pG0400-mut donor cells. See **Figure 6—source data 2**. In panels **(C)** and **(E)**, numbers of recipients and transconjugants following mating are shown in cfu/ml (colony-forming units per milliliter). Graphs show an average of five **(C)** or three **(E)** independent trials ( $\pm$  SD). Individual data points are shown with open circles, and data points on the x-axis represent at least one replicate where a value of 0 was obtained. The dotted line indicates the limit of detection for this assay. Two-tailed t-tests were performed on conjugation efficiencies to determine significance, and p-values of  $<0.05$  (\*) or  $<0.0005$  (\*\*\*) were obtained.

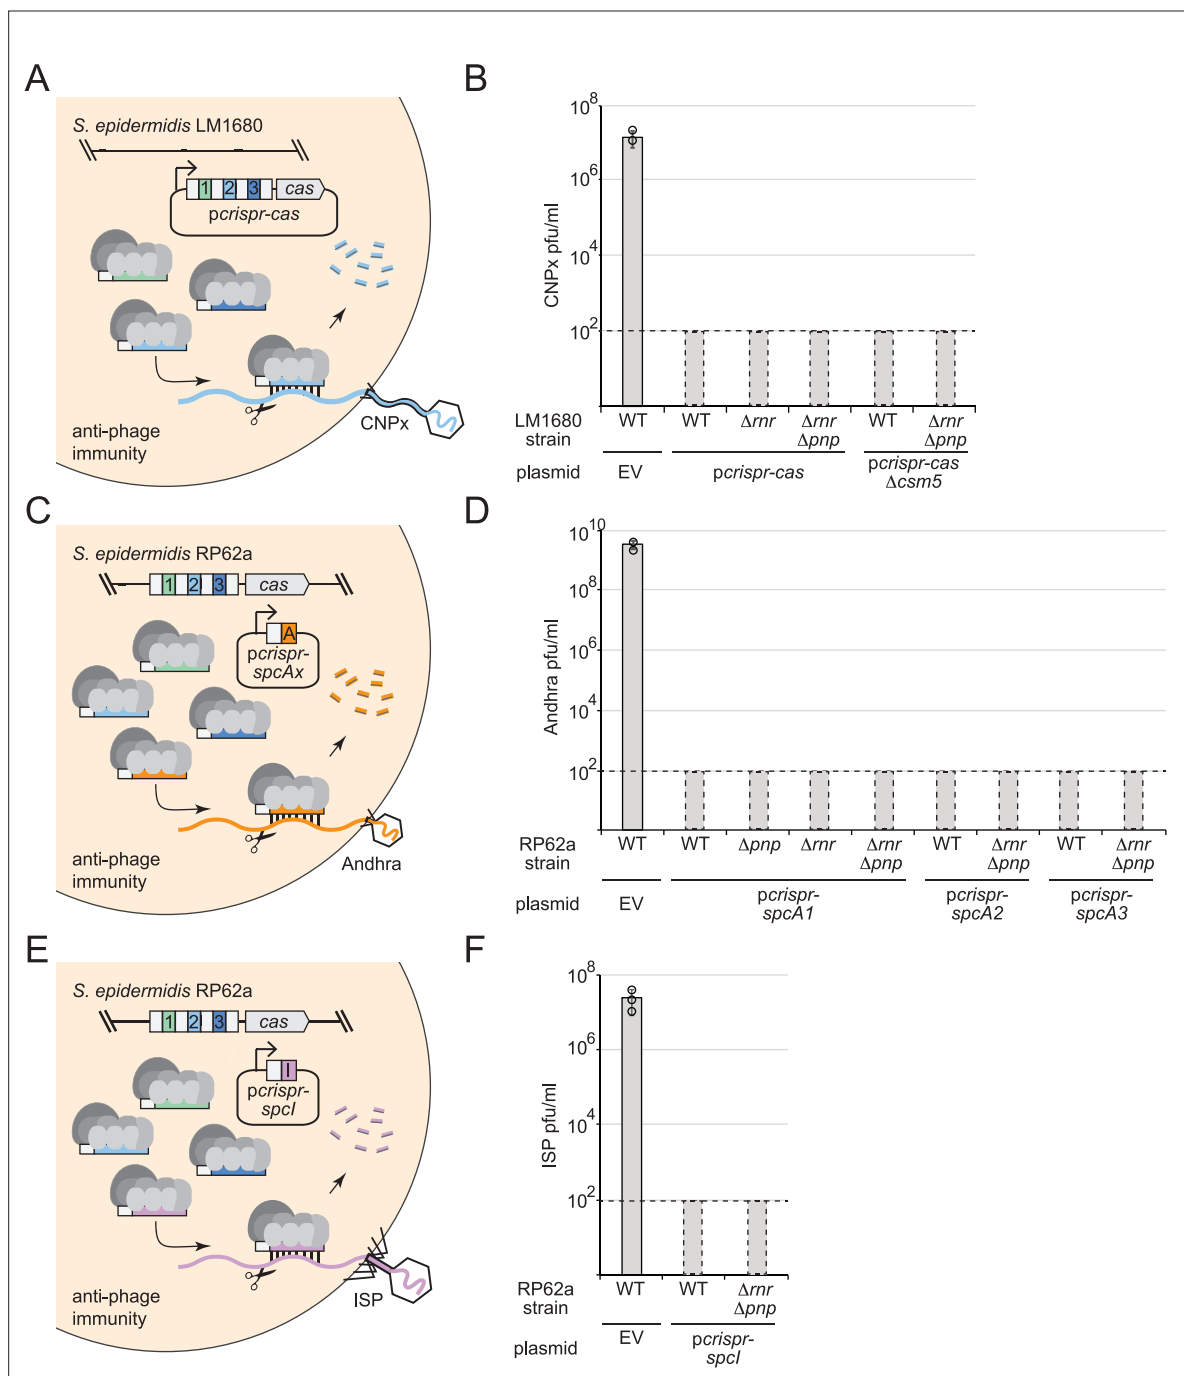

**Figure 6—figure supplement 1.** RNase R and PNPase are dispensable for anti-phage immunity. **(A)** Illustration of the assay used to test anti-phage immunity in *S. epidermidis* LM1680. In this assay, dilutions of the siphophage CNPx are placed atop lawns of cells containing variants of *pcrispr-cas*, in which the second spacer (*spc2*, light blue square) bears complementarity to the phage genome. **(B)** Graph showing results for the anti-phage assay in panel **(A)**. Indicated strains were challenged with CNPx and the resulting plaque-forming units per milliliter (pfu/ml) were enumerated. See **Figure 6—figure supplement 1—source data 1**. **(C)** Illustration of the assay used to test anti-phage immunity in *S. epidermidis* RP62a against phage Andhra. In this assay, the genome-encoded Cas10-Csm complex associates with crRNAs encoded in the plasmid *pcrispr-spcAx* (orange square) that target podophage Andhra. **(D)** Graph showing results for the anti-phage assay in panel **(C)**. Each *pcrispr-spcA* construct contains a single spacer that targets genes that encode Andhra's DNA polymerase (*spcA1*), major tail protein (*spcA2*), or lysin-like peptidase (*spcA3*). Indicated strains were challenged with Andhra and the resulting pfu/ml were enumerated. See **Figure 6—figure supplement 1—source data 2**. **(E)** Illustration of the assay used to test anti-phage immunity in *S. epidermidis* RP62a against phage ISP. In this assay, the genome-encoded Cas10-Csm complex associates with a spacer encoded in the plasmid *pcrispr-spcI* (purple square) that protects against myophage ISP. **(F)** Graph showing results for the anti-phage assay in panel **(E)**. The *pcrispr-spcI* construct contains a single spacer that targets ISP's lysin gene. Indicated strains were challenged with myophage ISP and the resulting pfu/ml were enumerated. See **Figure 6—figure supplement 1—source data 3**. **Figure 6—figure supplement 1 continued on next page**

*Figure 6—figure supplement 1 continued*

ml were enumerated. See **Figure 6—figure supplement 1—source data 3**. For all phage challenge assays, the data shown is an average ( $\pm$  SD) of three independent trials. Dotted lines on graphs indicate the limits of detection for these assays, and bars with dotted borders were inserted below the line to indicate zero plaques counted. EV, empty vector.



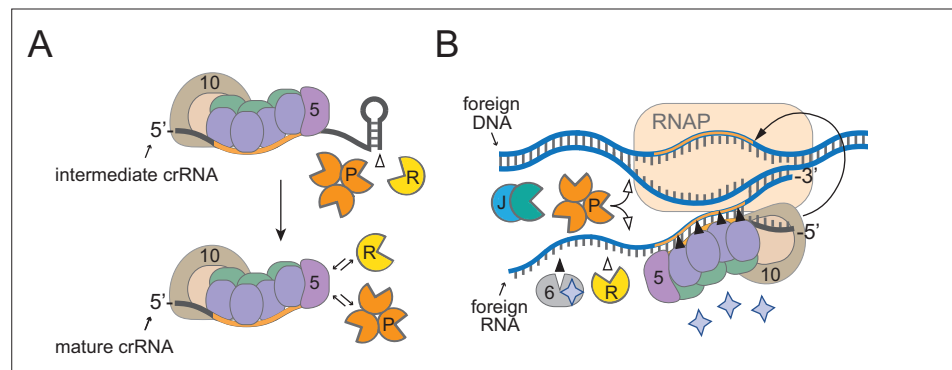

**Figure 7.** A model for how diverse housekeeping nucleases are enlisted to ensure successful defense. **(A)** During Cas10-Csm complex assembly, Csm5 recruits and/or stimulates RNase R and PNPase through direct interactions. The unprotected 3'-ends of intermediate crRNAs are trimmed as a consequence of nuclease recruitment, resulting in the generation of the shorter mature species. **(B)** During interference, RNase R and PNPase work synergistically to help degrade invading nucleic acids alongside other Cas and non-Cas nucleases. Filled triangles illustrate events catalyzed by Cas proteins, and open triangles illustrate events catalyzed by non-Cas nucleases. Purple stars represent cyclic oligoadenylate molecules produced by Cas10. 5, Csm5; 6, Csm6; 10, Cas10; R, RNase R; P, PNPase; J, RNase J1/J2; RNAP, RNA polymerase.
